# Supplementary material for: HOXA1 Is an Antagonist of ERα in Breast Cancer
Source: Front Oncol. 2021 Aug 18;11:609521. doi: 10.3389/fonc.2021.609521 (PMC8417444; doi:10.3389/fonc.2021.609521)
Supplement: Supplementary file 4 [file Table_3.xlsx]

## Sheet: Sheet 1
Gene	Correlations						Supplemental Table 3. HOXA1- and ER status-correlating genes in breast cancer datasets. Genes whose expression significantly correlates with HOXA1 mRNA expression as well as with ER status in 12 public genome-wide mRNA expression breast cancer datasets (See Table 1) were downloaded from R2. Only genes that showed the same correlation sign (positive or negative) in at least 6 of 12 datasets are li…
	HOXA1-Sign	HOXA1-Sets	ER-Sign	ER-Sets
DTYMK	Negative	6	Negative	8
ESRP1	Negative	7	Negative	7
PXMP2	Negative	6	Negative	6
A2M	Positive	9	Negative	6
ABCC10	Positive	6	Negative	9
ABCC4	Positive	9	Negative	11
ABTB2	Positive	7	Negative	10
ACAP1	Positive	8	Negative	9
ACE2	Positive	9	Negative	9
ACOT9	Positive	10	Negative	12
ACSL1	Positive	11	Negative	10
ACSL4	Positive	10	Negative	10
ACSL5	Positive	9	Negative	8
ACTB	Positive	6	Negative	8
ACTG2	Positive	9	Negative	9
ACTN1	Positive	7	Negative	8
ACTR3	Positive	10	Negative	12
ACVR2A	Positive	10	Negative	6
ADA	Positive	10	Negative	10
ADAM17	Positive	8	Negative	10
ADAM19	Positive	9	Negative	8
ADAMDEC1	Positive	9	Negative	11
ADAMTS1	Positive	10	Negative	7
ADAMTS3	Positive	9	Negative	8
ADAMTS9	Positive	9	Negative	6
ADCY2	Positive	6	Negative	7
ADCY3	Positive	8	Negative	6
ADCY7	Positive	11	Negative	10
ADD2	Positive	6	Negative	8
ADD3	Positive	11	Negative	7
ADM	Positive	10	Negative	10
ADORA2B	Positive	9	Negative	10
ADSL	Positive	6	Negative	10
AGPAT4	Positive	9	Negative	7
AGTPBP1	Positive	8	Negative	12
AIF1	Positive	10	Negative	8
AIM1	Positive	6	Negative	9
AIM2	Positive	12	Negative	12
AKAP7	Positive	9	Negative	11
AKR1B1	Positive	10	Negative	10
AKR1B10	Positive	6	Negative	8
AKR1C1	Positive	9	Negative	6
AKT3	Positive	10	Negative	7
ALDH1A3	Positive	11	Negative	11
ALK	Positive	8	Negative	7
ALPL	Positive	9	Negative	8
AMD1	Positive	6	Negative	10
AMPD2	Positive	9	Negative	9
ANGPT1	Positive	10	Negative	8
ANGPTL4	Positive	7	Negative	9
ANKS6	Positive	6	Negative	6
ANP32E	Positive	7	Negative	11
ANXA1	Positive	12	Negative	9
ANXA3	Positive	9	Negative	11
ANXA5	Positive	7	Negative	9
AOAH	Positive	7	Negative	8
APBA2	Positive	10	Negative	12
APOBEC3C	Positive	11	Negative	7
APOBEC3G	Positive	10	Negative	6
AQP5	Positive	7	Negative	9
AQP9	Positive	10	Negative	9
ARAP2	Positive	9	Negative	10
ARFGAP3	Positive	9	Negative	10
ARHGAP10	Positive	8	Negative	6
ARHGAP22	Positive	9	Negative	9
ARHGAP25	Positive	11	Negative	11
ARHGAP26	Positive	8	Negative	8
ARHGEF2	Positive	6	Negative	7
ARHGEF4	Positive	9	Negative	10
ARL4C	Positive	11	Negative	12
ARL5A	Positive	6	Negative	10
ARNTL2	Positive	10	Negative	10
ARPC1B	Positive	9	Negative	11
ARPC2	Positive	8	Negative	12
ARPC5	Positive	6	Negative	11
ART3	Positive	8	Negative	11
ASS1	Positive	9	Negative	12
ATF3	Positive	9	Negative	6
ATG3	Positive	7	Negative	10
ATG5	Positive	7	Negative	10
ATG9A	Positive	7	Negative	8
ATP11A	Positive	8	Negative	11
ATP11B	Positive	11	Negative	12
ATP11C	Positive	6	Negative	7
ATP1A1	Positive	6	Negative	11
ATP1B3	Positive	10	Negative	11
ATP8A1	Positive	6	Negative	7
AVEN	Positive	8	Negative	10
B3GNT3	Positive	9	Negative	9
B4GALT5	Positive	7	Negative	12
BACE2	Positive	11	Negative	12
BACH1	Positive	11	Negative	10
BACH2	Positive	11	Negative	7
BAG2	Positive	10	Negative	9
BANK1	Positive	8	Negative	9
BATF3	Positive	8	Negative	7
BBOX1	Positive	10	Negative	11
BCAT1	Positive	9	Negative	10
BCL11A	Positive	10	Negative	12
BCL11B	Positive	11	Negative	10
BCL2A1	Positive	11	Negative	11
BCL2L14	Positive	9	Negative	11
BICD1	Positive	8	Negative	6
BICD2	Positive	7	Negative	11
BID	Positive	7	Negative	11
BIN1	Positive	10	Negative	10
BIN2	Positive	10	Negative	10
BIRC2	Positive	7	Negative	11
BIRC3	Positive	11	Negative	11
BLM	Positive	6	Negative	10
BMP2	Positive	10	Negative	9
BNIP2	Positive	8	Negative	7
BORA	Positive	7	Negative	9
BPI	Positive	10	Negative	9
BTG3	Positive	10	Negative	11
BTK	Positive	12	Negative	7
BTN2A1	Positive	11	Negative	9
BTN2A2	Positive	8	Negative	10
BTN3A1	Positive	10	Negative	8
BTN3A2	Positive	6	Negative	10
BTN3A3	Positive	8	Negative	9
C10orf10	Positive	10	Negative	8
C11orf75	Positive	6	Negative	6
C11orf95	Positive	6	Negative	7
C12orf4	Positive	7	Negative	9
C1GALT1	Positive	11	Negative	12
C1orf106	Positive	8	Negative	11
C1orf116	Positive	9	Negative	7
C1orf54	Positive	9	Negative	6
C1QA	Positive	6	Negative	10
C1QB	Positive	7	Negative	11
C1QTNF1	Positive	7	Negative	8
C1R	Positive	10	Negative	7
C1S	Positive	11	Negative	8
C21orf91	Positive	9	Negative	10
C2orf44	Positive	7	Negative	7
C6orf106	Positive	7	Negative	9
C9orf40	Positive	9	Negative	10
CA3	Positive	7	Negative	6
CA9	Positive	6	Negative	9
CALB2	Positive	9	Negative	10
CALD1	Positive	10	Negative	8
CALML5	Positive	7	Negative	12
CAP1	Positive	7	Negative	11
CAPN2	Positive	6	Negative	9
CAPN6	Positive	10	Negative	8
CAPZA1	Positive	6	Negative	7
CARD9	Positive	7	Negative	7
CASP1	Positive	10	Negative	9
CASP10	Positive	7	Negative	8
CASP4	Positive	9	Negative	8
CAV2	Positive	10	Negative	8
CBFB	Positive	6	Negative	11
CCDC109B	Positive	8	Negative	10
CCDC50	Positive	6	Negative	6
CCDC82	Positive	8	Negative	8
CCDC88A	Positive	10	Negative	9
CCDC93	Positive	7	Negative	6
CCKBR	Positive	6	Negative	7
CCL13	Positive	9	Negative	11
CCL18	Positive	9	Negative	11
CCL19	Positive	10	Negative	6
CCL2	Positive	8	Negative	11
CCL20	Positive	8	Negative	10
CCL22	Positive	6	Negative	6
CCL4	Positive	6	Negative	7
CCL5	Positive	10	Negative	11
CCL7	Positive	9	Negative	9
CCL8	Positive	7	Negative	12
CCNB1IP1	Positive	6	Negative	11
CCND3	Positive	7	Negative	9
CCNE1	Positive	8	Negative	12
CCNL1	Positive	7	Negative	6
CCNYL1	Positive	6	Negative	7
CCR1	Positive	11	Negative	11
CCR2	Positive	11	Negative	11
CCR5	Positive	11	Negative	9
CCR7	Positive	9	Negative	10
CCSER2	Positive	6	Negative	8
CD14	Positive	9	Negative	11
CD163	Positive	10	Negative	11
CD180	Positive	11	Negative	10
CD19	Positive	11	Negative	10
CD2	Positive	10	Negative	11
CD209	Positive	7	Negative	9
CD247	Positive	10	Negative	10
CD27	Positive	9	Negative	10
CD300A	Positive	9	Negative	9
CD37	Positive	8	Negative	7
CD38	Positive	10	Negative	11
CD3D	Positive	10	Negative	11
CD3E	Positive	10	Negative	8
CD3G	Positive	10	Negative	10
CD4	Positive	8	Negative	9
CD40	Positive	9	Negative	7
CD40LG	Positive	7	Negative	6
CD48	Positive	11	Negative	12
CD52	Positive	9	Negative	8
CD53	Positive	11	Negative	11
CD58	Positive	10	Negative	11
CD6	Positive	10	Negative	9
CD7	Positive	8	Negative	9
CD72	Positive	8	Negative	10
CD74	Positive	7	Negative	8
CD79A	Positive	10	Negative	11
CD79B	Positive	10	Negative	11
CD80	Positive	7	Negative	7
CD82	Positive	8	Negative	11
CD83	Positive	10	Negative	8
CD84	Positive	9	Negative	7
CD86	Positive	9	Negative	10
CD8A	Positive	10	Negative	7
CD8B	Positive	10	Negative	10
CD96	Positive	11	Negative	7
CD97	Positive	6	Negative	6
CDC14B	Positive	7	Negative	7
CDC25B	Positive	7	Negative	12
CDC42EP1	Positive	7	Negative	9
CDC42EP3	Positive	8	Negative	10
CDC5L	Positive	6	Negative	9
CDH19	Positive	7	Negative	9
CDH3	Positive	9	Negative	12
CDK6	Positive	8	Negative	10
CDK8	Positive	8	Negative	11
CDKN2A	Positive	10	Negative	11
CDKN2C	Positive	7	Negative	10
CEBPB	Positive	9	Negative	12
CECR1	Positive	7	Negative	7
CELF2	Positive	10	Negative	9
CEP57	Positive	8	Negative	7
CERK	Positive	9	Negative	8
CFDP1	Positive	6	Negative	11
CFLAR	Positive	10	Negative	10
CHD1L	Positive	7	Negative	10
CHEK1	Positive	6	Negative	11
CHI3L1	Positive	9	Negative	12
CHI3L2	Positive	11	Negative	10
CHIC2	Positive	6	Negative	11
CHN1	Positive	9	Negative	11
CHODL	Positive	7	Negative	11
CHRM3	Positive	6	Negative	9
CHST11	Positive	11	Negative	10
CHST2	Positive	11	Negative	10
CHST3	Positive	8	Negative	10
CIB2	Positive	7	Negative	10
CIITA	Positive	9	Negative	7
CLCA2	Positive	7	Negative	9
CLCN4	Positive	7	Negative	10
CLCN5	Positive	6	Negative	9
CLDN1	Positive	7	Negative	9
CLDN10	Positive	6	Negative	8
CLDN8	Positive	9	Negative	8
CLEC4A	Positive	11	Negative	7
CLEC4E	Positive	8	Negative	6
CLEC7A	Positive	11	Negative	11
CLIC2	Positive	11	Negative	7
CLIC3	Positive	6	Negative	10
CLIC4	Positive	11	Negative	12
CLIP2	Positive	8	Negative	7
CLIP4	Positive	10	Negative	8
CLP1	Positive	6	Negative	9
CMPK1	Positive	6	Negative	11
CMTM7	Positive	6	Negative	6
CNGA1	Positive	9	Negative	11
CNN3	Positive	6	Negative	8
CNOT1	Positive	7	Negative	11
COL13A1	Positive	6	Negative	6
COL4A1	Positive	6	Negative	7
COL4A2	Positive	8	Negative	7
COL4A3	Positive	11	Negative	10
COL4A4	Positive	7	Negative	6
COL9A3	Positive	7	Negative	10
CORO1A	Positive	11	Negative	10
CORO1C	Positive	8	Negative	12
COTL1	Positive	11	Negative	11
CP	Positive	9	Negative	11
CPA4	Positive	6	Negative	8
CPVL	Positive	10	Negative	10
CR2	Positive	10	Negative	11
CRABP1	Positive	6	Negative	10
CREB3L2	Positive	8	Negative	11
CRLF1	Positive	6	Negative	6
CRLF3	Positive	7	Negative	11
CRTAM	Positive	9	Negative	6
CRYAB	Positive	10	Negative	10
CRYBG3	Positive	10	Negative	6
CSDA	Positive	6	Negative	6
CSF2RB	Positive	11	Negative	12
CSGALNACT1	Positive	11	Negative	7
CSN3	Positive	6	Negative	7
CSNK2A2	Positive	7	Negative	11
CSRP2	Positive	10	Negative	12
CST7	Positive	10	Negative	9
CSTA	Positive	7	Negative	10
CSTB	Positive	6	Negative	12
CTLA4	Positive	8	Negative	10
CTSB	Positive	6	Negative	9
CTSC	Positive	11	Negative	12
CTSS	Positive	9	Negative	12
CTSW	Positive	8	Negative	7
CTSZ	Positive	6	Negative	7
CTTNBP2NL	Positive	6	Negative	6
CX3CL1	Positive	9	Negative	12
CXCL1	Positive	11	Negative	11
CXCL10	Positive	6	Negative	12
CXCL11	Positive	7	Negative	10
CXCL13	Positive	9	Negative	10
CXCL2	Positive	10	Negative	8
CXCL3	Positive	9	Negative	10
CXCL6	Positive	6	Negative	8
CXCL9	Positive	9	Negative	12
CXCR4	Positive	8	Negative	10
CXCR6	Positive	9	Negative	10
CYB5R3	Positive	8	Negative	8
CYBA	Positive	7	Negative	9
CYBB	Positive	9	Negative	9
CYLD	Positive	8	Negative	9
CYP1B1	Positive	8	Negative	10
CYP26B1	Positive	10	Negative	9
CYP27A1	Positive	6	Negative	11
CYP39A1	Positive	8	Negative	10
CYP7B1	Positive	9	Negative	10
CYTH1	Positive	6	Negative	10
CYTIP	Positive	10	Negative	10
DAPK1	Positive	11	Negative	11
DAPP1	Positive	6	Negative	9
DCLRE1B	Positive	8	Negative	10
DCPS	Positive	7	Negative	11
DDC	Positive	6	Negative	8
DDIT4	Positive	9	Negative	11
DEF8	Positive	8	Negative	8
DEFB1	Positive	7	Negative	11
DEK	Positive	7	Negative	10
DENND3	Positive	7	Negative	7
DESI2	Positive	7	Negative	11
DIAPH1	Positive	6	Negative	11
DKK1	Positive	8	Negative	12
DLK1	Positive	6	Negative	6
DLX5	Positive	8	Negative	10
DMD	Positive	10	Negative	9
DNAH17	Positive	6	Negative	6
DNAJB4	Positive	9	Negative	8
DNAJC2	Positive	6	Negative	9
DOCK2	Positive	10	Negative	7
DOK2	Positive	10	Negative	11
DOK3	Positive	7	Negative	6
DOK5	Positive	11	Negative	10
DPYSL2	Positive	10	Negative	8
DR1	Positive	6	Negative	7
DRAM1	Positive	8	Negative	7
DSC2	Positive	10	Negative	12
DSC3	Positive	8	Negative	11
DSE	Positive	12	Negative	7
DSG1	Positive	8	Negative	7
DSG3	Positive	9	Negative	9
DTX4	Positive	9	Negative	11
DUSP11	Positive	6	Negative	7
DUSP2	Positive	9	Negative	9
DUSP22	Positive	10	Negative	12
DUSP7	Positive	11	Negative	10
DYNC1I1	Positive	8	Negative	11
DYRK2	Positive	6	Negative	8
DYSF	Positive	9	Negative	10
DZIP1	Positive	11	Negative	10
E2F3	Positive	10	Negative	12
EAF2	Positive	7	Negative	7
ECHDC1	Positive	8	Negative	9
EDN1	Positive	7	Negative	10
EDN2	Positive	6	Negative	7
EED	Positive	7	Negative	11
EFHD2	Positive	6	Negative	7
EFNA5	Positive	7	Negative	10
EFNB2	Positive	7	Negative	7
EGFL6	Positive	10	Negative	12
EGFR	Positive	10	Negative	12
EHBP1	Positive	9	Negative	9
EHD1	Positive	7	Negative	9
ELAC1	Positive	7	Negative	6
ELF5	Positive	10	Negative	11
ELK4	Positive	7	Negative	6
ELMO1	Positive	10	Negative	6
ELOVL4	Positive	8	Negative	8
EMILIN2	Positive	6	Negative	6
EML4	Positive	8	Negative	11
EMP3	Positive	11	Negative	6
EN1	Positive	9	Negative	11
ENO1	Positive	9	Negative	12
ENPP2	Positive	11	Negative	6
EOGT	Positive	9	Negative	7
EPB41L2	Positive	11	Negative	9
EPHA2	Positive	8	Negative	7
EPHA4	Positive	7	Negative	7
EPHB1	Positive	8	Negative	10
EPHB2	Positive	8	Negative	7
EPHB6	Positive	8	Negative	9
ERP44	Positive	6	Negative	10
ERV32	Positive	7	Negative	6
ETS1	Positive	6	Negative	7
ETS2	Positive	9	Negative	6
ETV6	Positive	6	Negative	10
ETV7	Positive	6	Negative	10
EVI2B	Positive	11	Negative	7
EXO5	Positive	6	Negative	8
EXT1	Positive	7	Negative	11
EXT2	Positive	8	Negative	8
F5	Positive	6	Negative	7
FABP5	Positive	11	Negative	11
FABP7	Positive	10	Negative	12
FAM107A	Positive	9	Negative	8
FAM118B	Positive	6	Negative	6
FAM13A	Positive	7	Negative	6
FAM171A1	Positive	9	Negative	10
FAM26F	Positive	6	Negative	6
FAM3C	Positive	7	Negative	9
FAM49A	Positive	10	Negative	12
FAM57A	Positive	8	Negative	9
FAM60A	Positive	6	Negative	12
FAM98A	Positive	8	Negative	11
FANCE	Positive	8	Negative	11
FAS	Positive	11	Negative	10
FASLG	Positive	6	Negative	7
FAT1	Positive	8	Negative	11
FBL	Positive	6	Negative	11
FBXW7	Positive	7	Negative	8
FCER1G	Positive	7	Negative	10
FCGR2A	Positive	7	Negative	6
FCGR2B	Positive	10	Negative	7
FCN1	Positive	8	Negative	9
FCN3	Positive	7	Negative	10
FCRL2	Positive	8	Negative	6
FDX1	Positive	6	Negative	11
FERMT1	Positive	9	Negative	10
FES	Positive	6	Negative	6
FGD2	Positive	8	Negative	6
FGF9	Positive	8	Negative	6
FGFBP1	Positive	7	Negative	9
FKBP11	Positive	7	Negative	11
FKBP14	Positive	8	Negative	6
FLNA	Positive	9	Negative	8
FMNL1	Positive	10	Negative	8
FMNL2	Positive	7	Negative	6
FMO1	Positive	10	Negative	7
FMO2	Positive	9	Negative	7
FNBP1	Positive	9	Negative	10
FNDC3B	Positive	10	Negative	12
FOLR1	Positive	9	Negative	11
FOXC1	Positive	10	Negative	12
FOXD1	Positive	6	Negative	8
FOXG1	Positive	7	Negative	7
FOXN2	Positive	7	Negative	8
FOXN3	Positive	9	Negative	7
FPR1	Positive	8	Negative	6
FPR3	Positive	7	Negative	9
FSCN1	Positive	11	Negative	11
FTL	Positive	7	Negative	6
FUT3	Positive	9	Negative	11
FUT4	Positive	10	Negative	11
FXYD5	Positive	9	Negative	10
FXYD6	Positive	9	Negative	10
FYB	Positive	10	Negative	11
FYN	Positive	11	Negative	9
FZD7	Positive	9	Negative	9
GABBR2	Positive	8	Negative	11
GABRP	Positive	10	Negative	11
GAL	Positive	8	Negative	12
GALNS	Positive	8	Negative	9
GALNT12	Positive	10	Negative	11
GALNT3	Positive	6	Negative	11
GALT	Positive	8	Negative	7
GARS	Positive	6	Negative	11
GAS1	Positive	10	Negative	6
GATA6	Positive	11	Negative	9
GBP1	Positive	11	Negative	12
GBP2	Positive	9	Negative	7
GCNT1	Positive	7	Negative	8
GCNT2	Positive	7	Negative	10
GFI1	Positive	8	Negative	7
GFOD1	Positive	9	Negative	10
GFPT2	Positive	9	Negative	6
GGH	Positive	7	Negative	11
GIMAP4	Positive	11	Negative	7
GJB3	Positive	9	Negative	10
GLG1	Positive	7	Negative	10
GLIPR1	Positive	9	Negative	6
GLS	Positive	11	Negative	9
GM2A	Positive	6	Negative	8
GMDS	Positive	7	Negative	11
GMFG	Positive	11	Negative	8
GMIP	Positive	6	Negative	8
GNA15	Positive	6	Negative	7
GNAI1	Positive	9	Negative	11
GNLY	Positive	8	Negative	10
GNPTAB	Positive	8	Negative	11
GOLGA8A	Positive	9	Negative	7
GOLT1B	Positive	6	Negative	9
GPM6B	Positive	9	Negative	11
GPN1	Positive	6	Negative	10
GPNMB	Positive	10	Negative	8
GPR161	Positive	9	Negative	11
GPR171	Positive	8	Negative	10
GPR18	Positive	11	Negative	10
GPR183	Positive	10	Negative	9
GPR64	Positive	6	Negative	6
GPR87	Positive	6	Negative	6
GPRC5B	Positive	9	Negative	12
GPRIN2	Positive	7	Negative	9
GPSM3	Positive	8	Negative	7
GPX7	Positive	10	Negative	11
GRAMD1B	Positive	7	Negative	6
GRAMD3	Positive	9	Negative	9
GSTA1	Positive	7	Negative	8
GSTP1	Positive	10	Negative	11
GTDC1	Positive	10	Negative	7
GTPBP8	Positive	8	Negative	11
GUCY1A3	Positive	10	Negative	11
GUCY1B3	Positive	10	Negative	7
GUSBP11	Positive	6	Negative	6
GVINP1	Positive	9	Negative	8
GYPC	Positive	10	Negative	8
GZMA	Positive	10	Negative	10
GZMB	Positive	11	Negative	11
GZMH	Positive	7	Negative	7
GZMK	Positive	9	Negative	7
H2AFY2	Positive	6	Negative	10
HAS2	Positive	7	Negative	6
HAUS7	Positive	6	Negative	9
HBEGF	Positive	7	Negative	6
HCG26	Positive	6	Negative	7
HCK	Positive	7	Negative	8
HCLS1	Positive	10	Negative	10
HDAC9	Positive	11	Negative	10
HECA	Positive	10	Negative	11
HEPH	Positive	9	Negative	6
HERC5	Positive	8	Negative	11
HIF1A	Positive	11	Negative	11
HIVEP2	Positive	9	Negative	9
HK3	Positive	6	Negative	8
HLA-A	Positive	6	Negative	10
HLA-B	Positive	7	Negative	9
HLA-C	Positive	7	Negative	8
HLA-DMA	Positive	10	Negative	7
HLA-DMB	Positive	9	Negative	8
HLA-DOB	Positive	11	Negative	11
HLA-DQB1	Positive	9	Negative	7
HLA-DRA	Positive	7	Negative	9
HLA-E	Positive	11	Negative	10
HLA-F	Positive	9	Negative	11
HMGN3	Positive	9	Negative	11
HOMER1	Positive	7	Negative	8
HORMAD1	Positive	6	Negative	6
HOXA1	Positive	11	Negative	9
HPS5	Positive	7	Negative	11
HPSE	Positive	7	Negative	10
HRASLS	Positive	8	Negative	12
HRH1	Positive	8	Negative	6
HS2ST1	Positive	7	Negative	9
HSD11B1	Positive	9	Negative	8
HSD17B12	Positive	6	Negative	12
HSD17B2	Positive	7	Negative	11
HSPBAP1	Positive	10	Negative	6
HYMAI	Positive	9	Negative	6
ICAM1	Positive	10	Negative	11
ICAM2	Positive	10	Negative	8
ICOS	Positive	11	Negative	9
ID4	Positive	10	Negative	9
IDO1	Positive	9	Negative	10
IFI16	Positive	11	Negative	10
IFI44	Positive	6	Negative	11
IFNAR2	Positive	11	Negative	11
IFNG	Positive	7	Negative	9
IFNGR1	Positive	10	Negative	11
IFRD1	Positive	7	Negative	11
IGF2BP2	Positive	6	Negative	9
IGF2BP3	Positive	10	Negative	10
IGFBP3	Positive	11	Negative	7
IGFLR1	Positive	8	Negative	9
IGHM	Positive	7	Negative	9
IGKC	Positive	8	Negative	9
IGLC1	Positive	8	Negative	8
IGLJ3	Positive	7	Negative	10
IGLL3P	Positive	8	Negative	9
IGLL5	Positive	7	Negative	10
IGLV1-44	Positive	6	Negative	9
IKZF1	Positive	9	Negative	11
IL10RA	Positive	11	Negative	10
IL12RB2	Positive	8	Negative	11
IL15	Positive	10	Negative	11
IL15RA	Positive	9	Negative	10
IL18	Positive	6	Negative	7
IL18R1	Positive	11	Negative	7
IL18RAP	Positive	10	Negative	8
IL1B	Positive	7	Negative	6
IL1R2	Positive	9	Negative	11
IL1RAP	Positive	9	Negative	7
IL21R	Positive	10	Negative	9
IL27RA	Positive	8	Negative	11
IL2RA	Positive	9	Negative	10
IL2RB	Positive	8	Negative	6
IL2RG	Positive	9	Negative	10
IL32	Positive	9	Negative	10
IL6	Positive	11	Negative	7
IL6R	Positive	9	Negative	9
IL7	Positive	10	Negative	9
IL7R	Positive	12	Negative	11
IL8	Positive	6	Negative	6
IMPA2	Positive	6	Negative	11
ING3	Positive	8	Negative	8
INPP4A	Positive	7	Negative	8
INPP5D	Positive	10	Negative	6
IPCEF1	Positive	9	Negative	6
IQCB1	Positive	6	Negative	10
IRAK1	Positive	7	Negative	11
IRF1	Positive	6	Negative	7
IRF4	Positive	9	Negative	8
IRF8	Positive	11	Negative	8
ITGA6	Positive	8	Negative	9
ITGA9	Positive	7	Negative	7
ITGB1	Positive	7	Negative	6
ITGB1BP1	Positive	6	Negative	7
ITGB2	Positive	11	Negative	11
ITGB7	Positive	9	Negative	10
ITGB8	Positive	8	Negative	10
ITK	Positive	11	Negative	10
ITM2C	Positive	11	Negative	12
IVNS1ABP	Positive	7	Negative	12
JAK2	Positive	6	Negative	6
JAK3	Positive	7	Negative	7
JOSD1	Positive	7	Negative	10
JRKL	Positive	9	Negative	11
KANK1	Positive	8	Negative	8
KARS	Positive	7	Negative	11
KATNA1	Positive	7	Negative	9
KCMF1	Positive	8	Negative	12
KCNAB2	Positive	9	Negative	7
KCNG1	Positive	8	Negative	10
KCNJ2	Positive	10	Negative	9
KCNK5	Positive	10	Negative	10
KCNMB1	Positive	8	Negative	8
KCNN4	Positive	9	Negative	11
KCTD20	Positive	6	Negative	7
KCTD9	Positive	8	Negative	7
KHDRBS3	Positive	6	Negative	11
KIAA0020	Positive	6	Negative	7
KIAA0125	Positive	8	Negative	8
KIAA0226L	Positive	10	Negative	8
KIAA0922	Positive	7	Negative	10
KIAA1549L	Positive	7	Negative	7
KIF21B	Positive	7	Negative	8
KIFC3	Positive	7	Negative	6
KIT	Positive	9	Negative	7
KLF11	Positive	11	Negative	11
KLF12	Positive	8	Negative	6
KLF5	Positive	9	Negative	11
KLHL21	Positive	7	Negative	7
KLHL7	Positive	10	Negative	10
KLK10	Positive	9	Negative	10
KLK5	Positive	9	Negative	10
KLK6	Positive	9	Negative	11
KLK7	Positive	10	Negative	9
KLK8	Positive	9	Negative	9
KLRB1	Positive	10	Negative	8
KLRD1	Positive	9	Negative	10
KLRF1	Positive	10	Negative	7
KPNA3	Positive	6	Negative	10
KPNA4	Positive	6	Negative	11
KRT14	Positive	9	Negative	6
KRT16	Positive	10	Negative	11
KRT23	Positive	9	Negative	10
KRT4	Positive	7	Negative	9
KRT5	Positive	9	Negative	9
KRT6A	Positive	8	Negative	10
KRT6B	Positive	10	Negative	11
KRT7	Positive	9	Negative	12
KRT81	Positive	8	Negative	12
KXD1	Positive	6	Negative	9
KYNU	Positive	7	Negative	12
L1CAM	Positive	6	Negative	10
LAD1	Positive	9	Negative	12
LAIR1	Positive	10	Negative	9
LAIR2	Positive	7	Negative	6
LALBA	Positive	6	Negative	8
LAMB3	Positive	9	Negative	6
LAMC2	Positive	9	Negative	7
LAMP3	Positive	11	Negative	12
LANCL2	Positive	6	Negative	8
LAPTM5	Positive	10	Negative	10
LAT	Positive	6	Negative	7
LAX1	Positive	9	Negative	10
LBH	Positive	10	Negative	9
LBP	Positive	8	Negative	9
LBR	Positive	12	Negative	12
LCK	Positive	10	Negative	11
LCN2	Positive	8	Negative	11
LCP1	Positive	9	Negative	12
LCP2	Positive	10	Negative	11
LDHB	Positive	11	Negative	11
LGALS2	Positive	10	Negative	9
LGALS9	Positive	7	Negative	9
LGALSL	Positive	6	Negative	9
LGMN	Positive	9	Negative	11
LGR5	Positive	6	Negative	8
LHFPL2	Positive	10	Negative	9
LIF	Positive	9	Negative	7
LILRB1	Positive	6	Negative	10
LILRB2	Positive	9	Negative	11
LILRB4	Positive	6	Negative	8
LIMD2	Positive	8	Negative	7
LIMK2	Positive	8	Negative	11
LIPG	Positive	11	Negative	9
LMO4	Positive	10	Negative	12
LPIN1	Positive	10	Negative	11
LPXN	Positive	12	Negative	10
LRIG3	Positive	6	Negative	6
LRMP	Positive	9	Negative	6
LRP12	Positive	7	Negative	11
LRP8	Positive	9	Negative	10
LRRC34	Positive	6	Negative	6
LRRC40	Positive	7	Negative	10
LRRC8B	Positive	7	Negative	11
LRRC8C	Positive	6	Negative	6
LRRC8D	Positive	8	Negative	11
LRRK1	Positive	9	Negative	7
LSM6	Positive	6	Negative	10
LST1	Positive	9	Negative	8
LTB	Positive	10	Negative	10
LTBP1	Positive	9	Negative	12
LTF	Positive	6	Negative	6
LY6D	Positive	9	Negative	10
LY75	Positive	11	Negative	10
LY9	Positive	9	Negative	6
LY96	Positive	11	Negative	10
LYN	Positive	11	Negative	11
LYPD1	Positive	6	Negative	7
LYZ	Positive	11	Negative	11
MAFF	Positive	7	Negative	8
MAL	Positive	9	Negative	8
MALL	Positive	10	Negative	12
MALT1	Positive	10	Negative	10
MAML2	Positive	6	Negative	6
MAMLD1	Positive	8	Negative	8
MAN2B1	Positive	10	Negative	9
MAP1B	Positive	8	Negative	7
MAP2	Positive	7	Negative	10
MAP2K6	Positive	6	Negative	11
MAP3K14	Positive	8	Negative	6
MAP3K5	Positive	7	Negative	11
MAP3K6	Positive	7	Negative	8
MAP3K7	Positive	6	Negative	7
MAP4K1	Positive	11	Negative	9
MAP4K4	Positive	11	Negative	9
MAPK14	Positive	7	Negative	9
MAPRE2	Positive	11	Negative	11
MARCH1	Positive	9	Negative	6
MARCKS	Positive	6	Negative	12
MARCO	Positive	9	Negative	10
MATK	Positive	7	Negative	7
MATN4	Positive	6	Negative	7
MBNL1	Positive	10	Negative	9
MBNL3	Positive	8	Negative	6
MBP	Positive	10	Negative	9
MCAM	Positive	9	Negative	7
MCCC1	Positive	6	Negative	11
MCM5	Positive	8	Negative	11
MCMBP	Positive	6	Negative	8
MCOLN2	Positive	6	Negative	6
MCTP2	Positive	7	Negative	9
MDFI	Positive	6	Negative	10
MDFIC	Positive	11	Negative	8
MDN1	Positive	8	Negative	10
ME1	Positive	7	Negative	11
ME2	Positive	8	Negative	11
MERTK	Positive	10	Negative	7
MET	Positive	10	Negative	11
MFAP3L	Positive	6	Negative	7
MFGE8	Positive	9	Negative	11
MFHAS1	Positive	10	Negative	11
MGAT1	Positive	10	Negative	9
MGAT3	Positive	8	Negative	8
MIA	Positive	10	Negative	11
MICAL3	Positive	7	Negative	10
MICALL1	Positive	9	Negative	11
MID1	Positive	6	Negative	6
MIIP	Positive	6	Negative	7
MINA	Positive	10	Negative	12
MKL1	Positive	8	Negative	7
MLKL	Positive	6	Negative	6
MLLT11	Positive	6	Negative	8
MLXIP	Positive	8	Negative	9
MMP1	Positive	7	Negative	11
MMP12	Positive	10	Negative	11
MMP7	Positive	10	Negative	11
MMP9	Positive	8	Negative	11
MNDA	Positive	10	Negative	6
MOB3B	Positive	7	Negative	10
MOXD1	Positive	11	Negative	9
MPHOSPH6	Positive	8	Negative	12
MPP6	Positive	9	Negative	10
MPZL1	Positive	6	Negative	8
MPZL2	Positive	9	Negative	12
MRAS	Positive	7	Negative	11
MRC1	Positive	9	Negative	10
MRE11A	Positive	7	Negative	10
MRPL2	Positive	6	Negative	9
MS4A1	Positive	9	Negative	9
MS4A4A	Positive	9	Negative	10
MSL3	Positive	10	Negative	10
MSLN	Positive	8	Negative	10
MSN	Positive	11	Negative	11
MT1X	Positive	6	Negative	12
MTMR2	Positive	9	Negative	12
MTO1	Positive	6	Negative	10
MUTYH	Positive	6	Negative	10
MX2	Positive	8	Negative	11
MYD88	Positive	8	Negative	11
MYL12A	Positive	6	Negative	9
MYO10	Positive	9	Negative	12
MYO1E	Positive	8	Negative	10
MYO1F	Positive	11	Negative	6
MYO9B	Positive	7	Negative	8
NAB1	Positive	9	Negative	9
NABP1	Positive	9	Negative	7
NAMPT	Positive	9	Negative	10
NCALD	Positive	8	Negative	8
NCF2	Positive	10	Negative	10
NCF4	Positive	11	Negative	7
NCK1	Positive	10	Negative	11
NCK2	Positive	10	Negative	12
NCKAP1L	Positive	11	Negative	11
NCOA7	Positive	6	Negative	6
NDEL1	Positive	8	Negative	10
NDRG1	Positive	9	Negative	11
NDRG2	Positive	9	Negative	7
NECAP2	Positive	9	Negative	9
NES	Positive	8	Negative	8
NFE2L3	Positive	11	Negative	11
NFIB	Positive	9	Negative	12
NFIL3	Positive	9	Negative	11
NFKBIE	Positive	9	Negative	11
NINJ2	Positive	9	Negative	6
NKG7	Positive	9	Negative	10
NMB	Positive	8	Negative	9
NMI	Positive	12	Negative	11
NMT2	Positive	9	Negative	10
NMU	Positive	7	Negative	11
NOD1	Positive	9	Negative	8
NOD2	Positive	6	Negative	6
NOL4	Positive	6	Negative	8
NOTCH1	Positive	9	Negative	11
NPAT	Positive	10	Negative	9
NPC1	Positive	8	Negative	10
NPC2	Positive	10	Negative	10
NPL	Positive	7	Negative	9
NPR3	Positive	7	Negative	6
NR1H3	Positive	7	Negative	6
NRAS	Positive	7	Negative	9
NRBF2	Positive	8	Negative	10
NRN1	Positive	10	Negative	7
NRP2	Positive	7	Negative	7
NRTN	Positive	7	Negative	10
NSMAF	Positive	8	Negative	10
NT5C2	Positive	9	Negative	11
NT5DC2	Positive	8	Negative	12
NT5DC3	Positive	6	Negative	6
NT5E	Positive	11	Negative	8
NUP160	Positive	6	Negative	10
NXN	Positive	11	Negative	12
NXPH4	Positive	6	Negative	7
OCA2	Positive	6	Negative	9
ODC1	Positive	10	Negative	11
OGFRL1	Positive	9	Negative	9
OLAH	Positive	6	Negative	8
OLFM4	Positive	8	Negative	6
OPN3	Positive	7	Negative	12
OPTN	Positive	9	Negative	11
OSBPL3	Positive	11	Negative	11
OSBPL9	Positive	9	Negative	6
OXCT1	Positive	9	Negative	11
P2RX5	Positive	10	Negative	11
P2RX7	Positive	6	Negative	7
P2RY10	Positive	8	Negative	8
P2RY14	Positive	10	Negative	6
P2RY6	Positive	7	Negative	11
PABPC4	Positive	6	Negative	11
PADI2	Positive	10	Negative	12
PAG1	Positive	6	Negative	6
PAK1IP1	Positive	9	Negative	10
PAK3	Positive	9	Negative	7
PAM	Positive	7	Negative	6
PANX1	Positive	6	Negative	9
PAPD7	Positive	7	Negative	9
PAPOLG	Positive	8	Negative	7
PAPSS1	Positive	7	Negative	11
PAPSS2	Positive	8	Negative	10
PAQR3	Positive	6	Negative	11
PAQR8	Positive	6	Negative	6
PAX5	Positive	7	Negative	9
PAX6	Positive	7	Negative	11
PCDH8	Positive	6	Negative	9
PCOLCE2	Positive	9	Negative	8
PCSK7	Positive	8	Negative	8
PDE1C	Positive	6	Negative	6
PDE4B	Positive	7	Negative	11
PDE9A	Positive	8	Negative	10
PDIA5	Positive	7	Negative	6
PDK1	Positive	7	Negative	10
PDLIM3	Positive	8	Negative	6
PDSS1	Positive	6	Negative	11
PDXK	Positive	8	Negative	11
PDZD2	Positive	8	Negative	6
PELI1	Positive	11	Negative	11
PEPD	Positive	6	Negative	7
PFKP	Positive	9	Negative	12
PGBD5	Positive	8	Negative	11
PGM1	Positive	9	Negative	12
PHACTR2	Positive	9	Negative	12
PHGDH	Positive	9	Negative	11
PI3	Positive	8	Negative	10
PICALM	Positive	8	Negative	11
PIK3AP1	Positive	6	Negative	6
PIK3C2G	Positive	7	Negative	6
PIK3CD	Positive	11	Negative	9
PILRA	Positive	7	Negative	8
PIM1	Positive	11	Negative	9
PIM2	Positive	8	Negative	11
PIP5K1B	Positive	7	Negative	8
PITPNC1	Positive	8	Negative	9
PIWIL4	Positive	6	Negative	6
PKP1	Positive	9	Negative	10
PLA2G2A	Positive	11	Negative	6
PLA2G2D	Positive	8	Negative	8
PLA2G4A	Positive	10	Negative	11
PLA2G7	Positive	10	Negative	11
PLAC8	Positive	11	Negative	11
PLAG1	Positive	7	Negative	7
PLAGL1	Positive	9	Negative	10
PLAUR	Positive	9	Negative	10
PLBD1	Positive	6	Negative	8
PLCE1	Positive	7	Negative	6
PLCG2	Positive	11	Negative	11
PLCH1	Positive	6	Negative	11
PLCL2	Positive	11	Negative	7
PLD1	Positive	9	Negative	9
PLEK	Positive	10	Negative	11
PLEKHA2	Positive	7	Negative	6
PLEKHA8P1	Positive	8	Negative	10
PLEKHF1	Positive	10	Negative	10
PLEKHG1	Positive	6	Negative	6
PLEKHO1	Positive	10	Negative	10
PLIN2	Positive	8	Negative	6
PLOD1	Positive	9	Negative	10
PLOD2	Positive	6	Negative	8
PLS3	Positive	11	Negative	10
PLSCR1	Positive	9	Negative	11
PLXNA1	Positive	6	Negative	10
PML	Positive	7	Negative	8
PNOC	Positive	7	Negative	8
PNP	Positive	6	Negative	11
PNRC1	Positive	8	Negative	11
PODXL	Positive	6	Negative	7
POLR1E	Positive	8	Negative	9
POLR3G	Positive	7	Negative	10
POM121L9P	Positive	7	Negative	6
POU2AF1	Positive	7	Negative	7
PPARA	Positive	7	Negative	7
PPARD	Positive	6	Negative	9
PPM1F	Positive	9	Negative	8
PPP1R16B	Positive	11	Negative	9
PPP1R1A	Positive	7	Negative	6
PPP2R1B	Positive	6	Negative	9
PPP2R3A	Positive	9	Negative	7
PQLC1	Positive	8	Negative	8
PRDM1	Positive	7	Negative	7
PREP	Positive	7	Negative	10
PRF1	Positive	11	Negative	11
PRKAA1	Positive	9	Negative	10
PRKAB2	Positive	6	Negative	7
PRKCA	Positive	11	Negative	9
PRKCB	Positive	10	Negative	8
PRKCDBP	Positive	9	Negative	7
PRKCQ	Positive	9	Negative	11
PRKD3	Positive	11	Negative	12
PRKX	Positive	9	Negative	11
PRKY	Positive	6	Negative	7
PRMT2	Positive	6	Negative	10
PRNP	Positive	11	Negative	12
PROM1	Positive	10	Negative	12
PROX1	Positive	6	Negative	7
PRRG1	Positive	9	Negative	11
PRRX2	Positive	8	Negative	8
PRSS12	Positive	8	Negative	6
PSAT1	Positive	10	Negative	12
PSIP1	Positive	8	Negative	8
PSMB9	Positive	10	Negative	11
PSMD7	Positive	6	Negative	10
PSTPIP1	Positive	10	Negative	9
PSTPIP2	Positive	6	Negative	9
PTAFR	Positive	7	Negative	6
PTBP2	Positive	6	Negative	7
PTCH1	Positive	10	Negative	10
PTDSS1	Positive	6	Negative	12
PTGDS	Positive	8	Negative	7
PTGER4	Positive	11	Negative	8
PTGFR	Positive	11	Negative	8
PTGS2	Positive	10	Negative	8
PTH2R	Positive	7	Negative	7
PTK7	Positive	9	Negative	10
PTPN14	Positive	10	Negative	10
PTPN2	Positive	11	Negative	10
PTPN22	Positive	10	Negative	11
PTPN7	Positive	10	Negative	9
PTPRC	Positive	12	Negative	10
PTPRCAP	Positive	9	Negative	9
PTPRK	Positive	7	Negative	12
PTPRZ1	Positive	7	Negative	9
PTX3	Positive	10	Negative	10
PUS3	Positive	9	Negative	10
PVRIG	Positive	10	Negative	8
PXDC1	Positive	8	Negative	9
QKI	Positive	10	Negative	12
QPCT	Positive	7	Negative	7
QSER1	Positive	6	Negative	9
RAB27A	Positive	10	Negative	9
RAB32	Positive	9	Negative	7
RAB6B	Positive	8	Negative	8
RAB7L1	Positive	6	Negative	6
RAC2	Positive	11	Negative	9
RAI14	Positive	8	Negative	8
RAP1A	Positive	10	Negative	7
RAP2A	Positive	9	Negative	11
RAP2B	Positive	12	Negative	12
RARB	Positive	7	Negative	6
RARRES1	Positive	10	Negative	12
RASA2	Positive	6	Negative	7
RASAL1	Positive	7	Negative	10
RASGRF1	Positive	7	Negative	6
RASGRP2	Positive	10	Negative	7
RASGRP3	Positive	12	Negative	9
RASSF2	Positive	11	Negative	10
RASSF4	Positive	9	Negative	11
RASSF5	Positive	7	Negative	6
RBM15	Positive	6	Negative	10
RBM38	Positive	6	Negative	10
RBM7	Positive	9	Negative	9
RBMS1	Positive	10	Negative	12
RBP1	Positive	7	Negative	9
RCAN1	Positive	10	Negative	10
RCN1	Positive	7	Negative	9
RCSD1	Positive	6	Negative	6
RDX	Positive	9	Negative	12
RECQL	Positive	6	Negative	6
REXO2	Positive	10	Negative	12
RFTN1	Positive	12	Negative	7
RGL1	Positive	11	Negative	8
RGS19	Positive	9	Negative	8
RGS2	Positive	12	Negative	9
RGS20	Positive	6	Negative	9
RHCG	Positive	8	Negative	9
RHEB	Positive	6	Negative	10
RHOF	Positive	9	Negative	9
RHOG	Positive	7	Negative	10
RHOQ	Positive	10	Negative	10
RIMS3	Positive	8	Negative	9
RIN3	Positive	10	Negative	8
RIPK2	Positive	8	Negative	10
RIPK4	Positive	8	Negative	10
RNASE1	Positive	8	Negative	7
RNASE2	Positive	8	Negative	6
RNASEH1	Positive	7	Negative	11
RND3	Positive	11	Negative	12
RNF145	Positive	7	Negative	6
RNF24	Positive	6	Negative	10
RNF8	Positive	9	Negative	9
ROBO1	Positive	8	Negative	10
ROCK2	Positive	8	Negative	10
ROPN1	Positive	6	Negative	6
ROPN1B	Positive	10	Negative	11
ROR1	Positive	11	Negative	7
RPS10	Positive	6	Negative	7
RPS25	Positive	6	Negative	6
RPS27A	Positive	6	Negative	10
RPS6KA3	Positive	6	Negative	8
RPS7	Positive	10	Negative	10
RRAGC	Positive	9	Negative	11
RRAGD	Positive	9	Negative	11
RRAS2	Positive	9	Negative	12
RSU1	Positive	10	Negative	12
RUNX1-IT1	Positive	7	Negative	6
RUNX3	Positive	11	Negative	12
RYR1	Positive	7	Negative	11
RYR3	Positive	8	Negative	7
S100A1	Positive	6	Negative	9
S100A10	Positive	8	Negative	11
S100A2	Positive	9	Negative	10
S100A3	Positive	7	Negative	6
S100A4	Positive	11	Negative	8
S100A6	Positive	8	Negative	9
S100A7	Positive	7	Negative	8
S100A8	Positive	10	Negative	12
S100A9	Positive	9	Negative	12
S100B	Positive	11	Negative	10
S1PR4	Positive	7	Negative	6
SACS	Positive	11	Negative	10
SAMD4A	Positive	10	Negative	7
SAMHD1	Positive	12	Negative	8
SAMSN1	Positive	8	Negative	10
SASH3	Positive	10	Negative	7
SAT1	Positive	10	Negative	11
SATB1	Positive	10	Negative	10
SCEL	Positive	8	Negative	10
SCPEP1	Positive	9	Negative	11
SCRG1	Positive	9	Negative	10
SDCBP	Positive	10	Negative	11
SDHD	Positive	7	Negative	8
SEL1L3	Positive	10	Negative	10
SELE	Positive	8	Negative	7
SELL	Positive	10	Negative	10
SEMA4D	Positive	11	Negative	10
SEPTIN006	Positive	6	Negative	8
SERBP1	Positive	6	Negative	11
SERPINB3	Positive	9	Negative	6
SERPINB5	Positive	9	Negative	10
SERPINB7	Positive	7	Negative	8
SERPINB8	Positive	6	Negative	7
SERPINB9	Positive	10	Negative	9
SERPINE2	Positive	11	Negative	11
SERPING1	Positive	9	Negative	7
SERPINH1	Positive	8	Negative	7
SF3A3	Positive	9	Negative	9
SFRP1	Positive	10	Negative	11
SFT2D2	Positive	10	Negative	11
SGK1	Positive	10	Negative	7
SH2D1A	Positive	10	Negative	9
SH2D2A	Positive	9	Negative	10
SH3BGRL3	Positive	7	Negative	10
SH3BP2	Positive	7	Negative	9
SH3GLB1	Positive	7	Negative	9
SHCBP1	Positive	7	Negative	10
SIGLEC1	Positive	6	Negative	6
SIM1	Positive	6	Negative	8
SIRPA	Positive	11	Negative	11
SIRPG	Positive	8	Negative	10
SIT1	Positive	10	Negative	11
SKP2	Positive	8	Negative	12
SLA	Positive	11	Negative	10
SLAMF1	Positive	10	Negative	9
SLAMF7	Positive	9	Negative	11
SLAMF8	Positive	11	Negative	11
SLC12A8	Positive	8	Negative	11
SLC15A1	Positive	7	Negative	9
SLC15A2	Positive	8	Negative	10
SLC16A1	Positive	7	Negative	10
SLC16A10	Positive	7	Negative	10
SLC16A7	Positive	9	Negative	7
SLC1A3	Positive	10	Negative	10
SLC25A37	Positive	8	Negative	8
SLC26A2	Positive	7	Negative	9
SLC27A6	Positive	6	Negative	8
SLC2A3	Positive	11	Negative	10
SLC2A5	Positive	9	Negative	11
SLC2A6	Positive	6	Negative	10
SLC34A2	Positive	9	Negative	11
SLC35F2	Positive	7	Negative	11
SLC36A1	Positive	9	Negative	7
SLC39A14	Positive	7	Negative	8
SLC43A3	Positive	11	Negative	11
SLC5A3	Positive	9	Negative	7
SLC5A6	Positive	7	Negative	12
SLC6A14	Positive	10	Negative	12
SLC6A15	Positive	7	Negative	9
SLC6A16	Positive	7	Negative	9
SLC6A2	Positive	7	Negative	9
SLC7A6	Positive	8	Negative	7
SLC7A7	Positive	10	Negative	10
SLC9A6	Positive	12	Negative	12
SLITRK5	Positive	7	Negative	10
SLPI	Positive	9	Negative	12
SMC5	Positive	8	Negative	9
SMC6	Positive	8	Negative	11
SMCHD1	Positive	7	Negative	10
SMNDC1	Positive	6	Negative	8
SMOX	Positive	6	Negative	9
SMPX	Positive	6	Negative	6
SMTN	Positive	7	Negative	6
SMYD2	Positive	9	Negative	11
SNAI1	Positive	6	Negative	7
SNTB1	Positive	7	Negative	9
SNX3	Positive	8	Negative	11
SOAT1	Positive	6	Negative	9
SOCS1	Positive	8	Negative	11
SOCS5	Positive	7	Negative	6
SOD2	Positive	6	Negative	7
SOD3	Positive	9	Negative	8
SOS1	Positive	9	Negative	9
SOSTDC1	Positive	11	Negative	11
SOX10	Positive	9	Negative	10
SOX11	Positive	6	Negative	12
SPATS2L	Positive	9	Negative	8
SPHK1	Positive	10	Negative	9
SPIB	Positive	9	Negative	9
SPOCK2	Positive	10	Negative	10
SPRY2	Positive	8	Negative	6
SPSB1	Positive	9	Negative	8
SRD5A1	Positive	8	Negative	12
SRF	Positive	7	Negative	8
SRGN	Positive	11	Negative	11
SRPK1	Positive	7	Negative	12
SRSF8	Positive	7	Negative	6
ST3GAL6	Positive	10	Negative	11
ST6GAL1	Positive	11	Negative	12
ST8SIA1	Positive	11	Negative	11
STAC	Positive	10	Negative	10
STAG3	Positive	6	Negative	10
STAP1	Positive	11	Negative	9
STAT4	Positive	11	Negative	8
STEAP1B	Positive	6	Negative	8
STEAP3	Positive	8	Negative	11
STK17A	Positive	11	Negative	11
STK17B	Positive	10	Negative	10
STK38	Positive	11	Negative	11
STK38L	Positive	6	Negative	11
STMN1	Positive	6	Negative	11
STON1	Positive	9	Negative	7
STX7	Positive	9	Negative	7
STYK1	Positive	8	Negative	9
SUN2	Positive	9	Negative	11
SVIL	Positive	8	Negative	7
SYCE1L	Positive	6	Negative	7
SYK	Positive	9	Negative	10
SYNM	Positive	8	Negative	7
TAF1D	Positive	6	Negative	9
TAF4B	Positive	8	Negative	11
TAF5	Positive	6	Negative	11
TAGAP	Positive	6	Negative	6
TANK	Positive	8	Negative	10
TAP1	Positive	7	Negative	11
TAP2	Positive	10	Negative	9
TBC1D1	Positive	8	Negative	11
TBC1D4	Positive	9	Negative	9
TBPL1	Positive	7	Negative	11
TBX21	Positive	7	Negative	6
TCF7	Positive	11	Negative	7
TCF7L1	Positive	9	Negative	11
TCF7L2	Positive	9	Negative	6
TCL1A	Positive	9	Negative	9
TCN2	Positive	8	Negative	7
TCP11L1	Positive	6	Negative	8
TDO2	Positive	9	Negative	11
TES	Positive	10	Negative	12
TEX10	Positive	8	Negative	11
TF	Positive	9	Negative	8
TFCP2L1	Positive	6	Negative	10
TFEB	Positive	8	Negative	7
TFEC	Positive	11	Negative	11
TGDS	Positive	7	Negative	7
TGFA	Positive	10	Negative	12
TGFB2	Positive	7	Negative	6
TGFBI	Positive	10	Negative	7
TGM5	Positive	6	Negative	7
THEMIS2	Positive	9	Negative	10
THOC5	Positive	9	Negative	11
TLE1	Positive	8	Negative	12
TLE4	Positive	10	Negative	10
TLR1	Positive	8	Negative	10
TLR2	Positive	11	Negative	10
TLR8	Positive	7	Negative	7
TMCC2	Positive	6	Negative	10
TMEM109	Positive	6	Negative	9
TMEM123	Positive	9	Negative	12
TMEM140	Positive	9	Negative	6
TMEM158	Positive	9	Negative	11
TMEM176A	Positive	7	Negative	7
TMEM176B	Positive	6	Negative	7
TMEM39A	Positive	8	Negative	9
TMEM39B	Positive	9	Negative	6
TMEM43	Positive	8	Negative	10
TMEM45A	Positive	9	Negative	10
TMEM71	Positive	6	Negative	6
TMSB10	Positive	9	Negative	11
TNFAIP2	Positive	7	Negative	6
TNFAIP3	Positive	11	Negative	10
TNFAIP8	Positive	11	Negative	11
TNFRSF11A	Positive	8	Negative	9
TNFRSF17	Positive	8	Negative	10
TNFRSF1B	Positive	11	Negative	9
TNFRSF21	Positive	8	Negative	12
TNFRSF25	Positive	6	Negative	7
TNFRSF9	Positive	9	Negative	8
TNFSF14	Positive	6	Negative	6
TNFSF15	Positive	8	Negative	8
TNNI2	Positive	9	Negative	9
TOX	Positive	11	Negative	10
TP53BP2	Positive	7	Negative	11
TP53I3	Positive	11	Negative	7
TPM2	Positive	9	Negative	6
TRAC	Positive	9	Negative	8
TRAF1	Positive	10	Negative	9
TRAF3IP3	Positive	11	Negative	12
TRAM2	Positive	8	Negative	6
TRAT1	Positive	11	Negative	8
TRBC1	Positive	9	Negative	8
TRDMT1	Positive	9	Negative	9
TRDV3	Positive	7	Negative	6
TREM1	Positive	7	Negative	7
TRIB2	Positive	6	Negative	8
TRIM2	Positive	10	Negative	12
TRIM22	Positive	9	Negative	9
TRIM26	Positive	6	Negative	8
TRIM29	Positive	9	Negative	12
TRIM38	Positive	7	Negative	6
TRIP10	Positive	8	Negative	8
TRMT11	Positive	9	Negative	11
TRPV2	Positive	8	Negative	7
TRPV6	Positive	7	Negative	12
TSPAN33	Positive	6	Negative	6
TSPAN6	Positive	8	Negative	9
TSPYL5	Positive	8	Negative	11
TTC13	Positive	6	Negative	9
TTLL4	Positive	8	Negative	12
TTYH1	Positive	8	Negative	10
TUBA4A	Positive	9	Negative	12
TUBB2B	Positive	8	Negative	6
TUBB6	Positive	11	Negative	11
TXNL4B	Positive	6	Negative	7
TYROBP	Positive	6	Negative	6
UBASH3A	Positive	9	Negative	8
UBE2D1	Positive	8	Negative	11
UBE2E3	Positive	11	Negative	12
UBE2J1	Positive	8	Negative	11
UBR4	Positive	8	Negative	7
UCHL1	Positive	10	Negative	10
UCHL3	Positive	6	Negative	11
UGP2	Positive	8	Negative	12
UGT8	Positive	11	Negative	11
UPF2	Positive	6	Negative	9
UPP1	Positive	11	Negative	11
URB1	Positive	6	Negative	7
USB1	Positive	8	Negative	11
USP25	Positive	7	Negative	9
VAMP5	Positive	10	Negative	6
VAV1	Positive	10	Negative	8
VCAM1	Positive	11	Negative	11
VCL	Positive	8	Negative	6
VGLL1	Positive	9	Negative	12
VIM	Positive	11	Negative	8
VLDLR	Positive	10	Negative	11
VNN1	Positive	7	Negative	10
VNN2	Positive	9	Negative	8
VPREB3	Positive	9	Negative	8
VSIG4	Positive	7	Negative	8
VSNL1	Positive	7	Negative	8
WARS	Positive	8	Negative	11
WAS	Positive	11	Negative	7
WASF1	Positive	6	Negative	10
WASF2	Positive	8	Negative	6
WASF3	Positive	8	Negative	9
WDR91	Positive	7	Negative	7
WIF1	Positive	7	Negative	8
WIPF1	Positive	11	Negative	6
WNT2	Positive	9	Negative	6
WNT5B	Positive	8	Negative	10
WWP2	Positive	7	Negative	6
WWTR1	Positive	10	Negative	8
XDH	Positive	6	Negative	6
XPNPEP1	Positive	9	Negative	10
YAP1	Positive	7	Negative	8
YBX1	Positive	9	Negative	12
YEATS2	Positive	9	Negative	11
YES1	Positive	8	Negative	10
YOD1	Positive	6	Negative	9
ZAP70	Positive	9	Negative	8
ZBED2	Positive	8	Negative	9
ZBP1	Positive	7	Negative	9
ZBTB5	Positive	6	Negative	10
ZC4H2	Positive	6	Negative	7
ZCCHC11	Positive	9	Negative	10
ZDHHC14	Positive	7	Negative	8
ZDHHC18	Positive	6	Negative	9
ZFAND5	Positive	8	Negative	9
ZIC1	Positive	10	Negative	11
ZNF22	Positive	10	Negative	11
ZNF532	Positive	9	Negative	8
ZNF667	Positive	8	Negative	7
ZYX	Positive	7	Negative	9
AAAS	Negative	7	Positive	10
AAGAB	Negative	8	Positive	9
ABAT	Negative	10	Positive	11
ABCA2	Negative	6	Positive	10
ABCA3	Negative	10	Positive	11
ABCC5	Negative	8	Positive	12
ABCC8	Negative	8	Positive	11
ABCD3	Negative	7	Positive	11
ABCG1	Negative	7	Positive	9
ABHD2	Negative	7	Positive	11
ABLIM3	Negative	7	Positive	11
ACADSB	Negative	9	Positive	12
ACIN1	Negative	6	Positive	8
ACOX2	Negative	9	Positive	10
ACVR1B	Negative	10	Positive	11
ADCK2	Negative	6	Positive	7
ADCY1	Negative	9	Positive	11
ADCY6	Negative	8	Positive	11
ADCY9	Negative	8	Positive	12
ADD1	Negative	6	Positive	10
ADIPOR1	Negative	8	Positive	6
ADIPOR2	Negative	8	Positive	10
ADNP	Negative	7	Positive	6
AES	Negative	6	Positive	7
AFF3	Negative	12	Positive	12
AGGF1	Negative	6	Positive	9
AGR2	Negative	11	Positive	12
AGR3	Negative	6	Positive	7
AGTR1	Negative	7	Positive	10
AHCYL1	Negative	7	Positive	10
AK1	Negative	6	Positive	6
AKAP8L	Negative	8	Positive	7
AKR7A2	Negative	7	Positive	10
AKR7A3	Negative	11	Positive	12
ALAD	Negative	7	Positive	10
ALCAM	Negative	6	Positive	10
ALDH3A2	Negative	7	Positive	8
ALDH4A1	Negative	6	Positive	8
ALDH6A1	Negative	10	Positive	11
ALDOA	Negative	7	Positive	8
ALG8	Negative	8	Positive	7
ALKBH1	Negative	6	Positive	9
AMBP	Negative	6	Positive	8
AMFR	Negative	8	Positive	10
AMZ2	Negative	8	Positive	6
ANAPC2	Negative	6	Positive	7
ANG	Negative	6	Positive	10
ANKRA2	Negative	9	Positive	12
ANKRD30A	Negative	6	Positive	7
ANXA9	Negative	11	Positive	12
AP1AR	Negative	8	Positive	8
AP1G2	Negative	8	Positive	10
AP1M2	Negative	10	Positive	9
AP2B1	Negative	9	Positive	11
APBB2	Negative	10	Positive	11
APEH	Negative	9	Positive	9
APMAP	Negative	6	Positive	6
APPBP2	Negative	7	Positive	9
APPL1	Negative	6	Positive	8
APPL2	Negative	7	Positive	10
AR	Negative	11	Positive	11
ARF3	Negative	9	Positive	10
ARFGEF1	Negative	8	Positive	10
ARFIP1	Negative	9	Positive	10
ARFIP2	Negative	11	Positive	11
ARHGAP32	Negative	10	Positive	10
ARHGAP35	Negative	6	Positive	9
ARHGEF16	Negative	7	Positive	9
ARHGEF26	Negative	6	Positive	9
ARL3	Negative	10	Positive	12
ARL6IP4	Negative	6	Positive	8
ARL8B	Negative	7	Positive	8
ARMC9	Negative	7	Positive	10
ARNT2	Negative	7	Positive	12
ARPP19	Negative	9	Positive	9
ARSD	Negative	10	Positive	12
ASAH1	Negative	6	Positive	11
ASB13	Negative	7	Positive	12
ASB8	Negative	6	Positive	10
ASNA1	Negative	7	Positive	6
ASTN2	Negative	9	Positive	10
ATG12	Negative	6	Positive	8
ATP13A2	Negative	6	Positive	6
ATP2C2	Negative	10	Positive	7
ATP5D	Negative	8	Positive	7
ATP5G2	Negative	9	Positive	10
ATP5I	Negative	6	Positive	6
ATP5SL	Negative	6	Positive	8
ATP6AP1	Negative	10	Positive	9
ATP6V0C	Negative	9	Positive	6
ATP6V0E2	Negative	7	Positive	8
ATP6V1G1	Negative	8	Positive	7
ATP6V1H	Negative	6	Positive	7
ATP7B	Negative	7	Positive	11
ATP8B1	Negative	6	Positive	9
ATP9A	Negative	8	Positive	7
ATPIF1	Negative	6	Positive	7
ATXN2	Negative	8	Positive	10
AZGP1	Negative	7	Positive	10
BAD	Negative	6	Positive	7
BAG1	Negative	8	Positive	9
BAG3	Negative	7	Positive	11
BAIAP2	Negative	8	Positive	9
BAIAP3	Negative	7	Positive	10
BBS1	Negative	11	Positive	11
BBS4	Negative	10	Positive	11
BCAM	Negative	10	Positive	12
BCAS1	Negative	9	Positive	11
BCAS4	Negative	10	Positive	12
BCAT2	Negative	8	Positive	12
BCKDK	Negative	6	Positive	9
BCL2	Negative	8	Positive	10
BCL2L1	Negative	6	Positive	7
BCL9	Negative	8	Positive	8
BCOR	Negative	6	Positive	8
BECN1	Negative	7	Positive	10
BEX1	Negative	6	Positive	11
BHLHE40	Negative	9	Positive	11
BIK	Negative	9	Positive	11
BLOC1S1	Negative	8	Positive	10
BLVRA	Negative	8	Positive	10
BLVRB	Negative	9	Positive	9
BMPR1B	Negative	10	Positive	12
BRD3	Negative	7	Positive	7
BRD8	Negative	6	Positive	10
BTD	Negative	9	Positive	9
BTF3	Negative	9	Positive	11
BTRC	Negative	8	Positive	11
BUB3	Negative	8	Positive	10
BZW1	Negative	7	Positive	8
C10orf116	Negative	6	Positive	6
C11orf49	Negative	9	Positive	10
C11orf58	Negative	6	Positive	6
C12orf10	Negative	10	Positive	10
C12orf43	Negative	6	Positive	9
C14orf169	Negative	6	Positive	7
C14orf79	Negative	10	Positive	11
C16orf45	Negative	7	Positive	12
C16orf58	Negative	7	Positive	8
C19orf21	Negative	6	Positive	6
C1orf21	Negative	9	Positive	11
C1orf27	Negative	8	Positive	9
C3orf14	Negative	6	Positive	8
C3orf52	Negative	8	Positive	12
C5orf15	Negative	6	Positive	10
C5orf30	Negative	11	Positive	12
C6orf211	Negative	6	Positive	6
C9orf116	Negative	8	Positive	11
C9orf91	Negative	8	Positive	8
CA12	Negative	12	Positive	12
CACFD1	Negative	9	Positive	10
CACNA1D	Negative	8	Positive	12
CACNA2D2	Negative	8	Positive	11
CACNG4	Negative	8	Positive	10
CALCOCO2	Negative	8	Positive	10
CAMK2B	Negative	7	Positive	10
CAMK2N1	Negative	10	Positive	10
CAMLG	Negative	6	Positive	10
CANT1	Negative	9	Positive	8
CAP2	Negative	6	Positive	12
CAPN8	Negative	6	Positive	6
CAPN9	Negative	7	Positive	11
CARD10	Negative	6	Positive	11
CASC1	Negative	7	Positive	12
CASD1	Negative	7	Positive	10
CASP6	Negative	7	Positive	9
CASZ1	Negative	6	Positive	7
CBR4	Negative	9	Positive	10
CBX4	Negative	9	Positive	11
CCDC106	Negative	7	Positive	11
CCDC170	Negative	8	Positive	11
CCDC22	Negative	9	Positive	6
CCDC51	Negative	6	Positive	7
CCDC91	Negative	6	Positive	8
CCND1	Negative	11	Positive	12
CCNG2	Negative	7	Positive	11
CCNH	Negative	7	Positive	11
CCP110	Negative	7	Positive	9
CD151	Negative	7	Positive	9
CD2BP2	Negative	7	Positive	9
CD46	Negative	6	Positive	10
CDC42BPB	Negative	6	Positive	7
CDK17	Negative	7	Positive	9
CDK20	Negative	6	Positive	6
CDK5RAP3	Negative	7	Positive	10
CDK7	Negative	7	Positive	8
CDK9	Negative	7	Positive	6
CDS1	Negative	10	Positive	9
CDS2	Negative	7	Positive	10
CELSR1	Negative	11	Positive	12
CELSR2	Negative	10	Positive	12
CEP290	Negative	6	Positive	11
CERS2	Negative	10	Positive	9
CERS4	Negative	8	Positive	9
CERS6	Negative	9	Positive	10
CETN2	Negative	9	Positive	8
CETN3	Negative	9	Positive	10
CGA	Negative	6	Positive	11
CHAD	Negative	9	Positive	11
CHD1	Negative	7	Positive	11
CHMP2A	Negative	9	Positive	10
CHRD	Negative	9	Positive	12
CHST15	Negative	6	Positive	10
CHST8	Negative	6	Positive	11
CIB1	Negative	9	Positive	10
CIRBP	Negative	9	Positive	11
CISH	Negative	7	Positive	11
CLASP2	Negative	8	Positive	8
CLCN3	Negative	10	Positive	9
CLGN	Negative	6	Positive	9
CLN3	Negative	6	Positive	6
CLSTN2	Negative	9	Positive	12
CLUAP1	Negative	6	Positive	10
CNNM3	Negative	6	Positive	10
CNNM4	Negative	9	Positive	10
COA3	Negative	8	Positive	10
COASY	Negative	9	Positive	10
COG2	Negative	9	Positive	11
COG7	Negative	10	Positive	10
COL4A3BP	Negative	6	Positive	8
COMMD10	Negative	6	Positive	9
COMMD3	Negative	8	Positive	7
COPS7A	Negative	6	Positive	9
COPZ1	Negative	10	Positive	9
COQ4	Negative	11	Positive	10
COQ6	Negative	8	Positive	10
COQ7	Negative	9	Positive	11
CORO2A	Negative	9	Positive	10
COX15	Negative	6	Positive	10
COX17	Negative	6	Positive	7
COX6A1	Negative	9	Positive	7
COX6C	Negative	10	Positive	12
COX7C	Negative	6	Positive	9
CPB1	Negative	7	Positive	11
CPLX1	Negative	6	Positive	6
CPNE3	Negative	8	Positive	8
CPT1A	Negative	6	Positive	8
CRABP2	Negative	8	Positive	11
CRIP1	Negative	9	Positive	12
CRIP2	Negative	10	Positive	10
CRNKL1	Negative	10	Positive	12
CSAD	Negative	8	Positive	11
CSNK1A1	Negative	8	Positive	11
CSNK1D	Negative	8	Positive	6
CSNK1G3	Negative	6	Positive	9
CSRNP2	Negative	9	Positive	9
CST3	Negative	6	Positive	11
CTNNA1	Negative	7	Positive	10
CTNND2	Negative	6	Positive	8
CTPS2	Negative	7	Positive	9
CTR9	Negative	6	Positive	10
CTSF	Negative	6	Positive	11
CUEDC1	Negative	8	Positive	10
CUEDC2	Negative	6	Positive	6
CUL3	Negative	6	Positive	6
CXorf40A	Negative	8	Positive	9
CXorf40B	Negative	9	Positive	10
CXXC4	Negative	6	Positive	9
CYB561D2	Negative	7	Positive	10
CYB5A	Negative	8	Positive	11
CYB5R1	Negative	10	Positive	10
CYP4B1	Negative	8	Positive	11
CYTH2	Negative	6	Positive	6
DACH1	Negative	9	Positive	12
DAD1	Negative	9	Positive	6
DAK	Negative	6	Positive	6
DALRD3	Negative	10	Positive	11
DAZAP2	Negative	6	Positive	11
DBP	Negative	6	Positive	11
DCAF10	Negative	8	Positive	10
DCAF11	Negative	7	Positive	9
DCTN4	Negative	7	Positive	10
DCXR	Negative	10	Positive	8
DDRGK1	Negative	6	Positive	6
DDX23	Negative	8	Positive	6
DECR2	Negative	9	Positive	12
DENND1B	Negative	7	Positive	7
DGKD	Negative	7	Positive	9
DHCR24	Negative	9	Positive	11
DHPS	Negative	8	Positive	9
DHRS7	Negative	7	Positive	8
DHX29	Negative	6	Positive	10
DHX40	Negative	8	Positive	8
DIO1	Negative	9	Positive	9
DLG5	Negative	11	Positive	12
DMXL1	Negative	6	Positive	10
DNAAF1	Negative	8	Positive	11
DNAJB12	Negative	6	Positive	8
DNAJB14	Negative	6	Positive	9
DNAJC1	Negative	10	Positive	10
DNAJC12	Negative	11	Positive	12
DNAJC16	Negative	9	Positive	10
DNAJC17	Negative	8	Positive	10
DNAL1	Negative	6	Positive	7
DNALI1	Negative	10	Positive	11
DNPEP	Negative	6	Positive	9
DOLK	Negative	8	Positive	8
DOPEY2	Negative	7	Positive	6
DSTN	Negative	7	Positive	10
DUSP4	Negative	7	Positive	10
DUSP5	Negative	7	Positive	10
DUSP8	Negative	9	Positive	6
DYNLRB1	Negative	8	Positive	7
DYNLRB2	Negative	6	Positive	6
DYNLT3	Negative	7	Positive	11
E4F1	Negative	9	Positive	11
EAPP	Negative	10	Positive	10
ECHS1	Negative	9	Positive	7
ECI1	Negative	9	Positive	9
ECI2	Negative	8	Positive	11
EDEM3	Negative	8	Positive	9
EEF1A2	Negative	10	Positive	11
EFHC1	Negative	9	Positive	12
EFHD1	Negative	11	Positive	9
EID1	Negative	6	Positive	10
ELMO3	Negative	9	Positive	9
ELOVL2	Negative	7	Positive	12
ELOVL5	Negative	7	Positive	11
EMC3	Negative	9	Positive	9
EMC7	Negative	6	Positive	7
EML2	Negative	9	Positive	10
EMP2	Negative	11	Positive	11
ENSA	Negative	7	Positive	7
ENTPD5	Negative	6	Positive	10
EPB41L1	Negative	9	Positive	10
EPN3	Negative	11	Positive	8
EPS15L1	Negative	6	Positive	10
EPS8L1	Negative	6	Positive	11
ERBB2IP	Negative	6	Positive	8
ERBB3	Negative	9	Positive	10
ERBB4	Negative	10	Positive	11
ERI2	Negative	9	Positive	9
ERLIN2	Negative	6	Positive	12
ERMP1	Negative	7	Positive	8
ESR1	Negative	11	Positive	12
ETNK2	Negative	7	Positive	11
EVA1B	Negative	8	Positive	10
EVL	Negative	9	Positive	12
EXD2	Negative	9	Positive	9
EXOC2	Negative	6	Positive	9
EXOC7	Negative	7	Positive	6
EZR	Negative	6	Positive	7
F7	Negative	6	Positive	11
FAAH	Negative	10	Positive	11
FAH	Negative	8	Positive	11
FAM102A	Negative	10	Positive	10
FAM110B	Negative	9	Positive	11
FAM120A	Negative	8	Positive	9
FAM134A	Negative	10	Positive	9
FAM134B	Negative	10	Positive	12
FAM173A	Negative	9	Positive	10
FAM174B	Negative	10	Positive	11
FAM179B	Negative	8	Positive	9
FAM63A	Negative	8	Positive	11
FAM83E	Negative	6	Positive	8
FAM86C1	Negative	6	Positive	6
FANCF	Negative	8	Positive	6
FANK1	Negative	6	Positive	7
FASN	Negative	8	Positive	7
FBP1	Negative	10	Positive	11
FBXL15	Negative	8	Positive	7
FBXL2	Negative	8	Positive	10
FBXL5	Negative	7	Positive	10
FBXL7	Negative	9	Positive	12
FBXO21	Negative	7	Positive	9
FBXW4	Negative	10	Positive	11
FDXR	Negative	10	Positive	12
FEM1B	Negative	6	Positive	6
FEM1C	Negative	6	Positive	9
FGFR3	Negative	8	Positive	11
FIS1	Negative	6	Positive	10
FKBP3	Negative	7	Positive	8
FKBP4	Negative	10	Positive	10
FLNB	Negative	9	Positive	12
FLOT1	Negative	8	Positive	10
FMO5	Negative	6	Positive	12
FOXA1	Negative	10	Positive	12
FPGT	Negative	6	Positive	9
FRS2	Negative	6	Positive	9
FRY	Negative	6	Positive	10
FUT8	Negative	7	Positive	11
FUZ	Negative	9	Positive	8
FXYD3	Negative	7	Positive	9
FYCO1	Negative	7	Positive	10
G6PC3	Negative	11	Positive	11
GAK	Negative	9	Positive	10
GALNT6	Negative	9	Positive	12
GALNT7	Negative	9	Positive	10
GAMT	Negative	11	Positive	10
GAPVD1	Negative	7	Positive	8
GAS8	Negative	8	Positive	6
GATA3	Negative	12	Positive	12
GDE1	Negative	6	Positive	9
GDF15	Negative	10	Positive	10
GDI1	Negative	7	Positive	6
GEMIN8	Negative	8	Positive	9
GFRA1	Negative	9	Positive	12
GGPS1	Negative	8	Positive	6
GIN1	Negative	7	Positive	9
GLCE	Negative	7	Positive	11
GLI3	Negative	8	Positive	11
GLRB	Negative	7	Positive	10
GLS2	Negative	7	Positive	11
GLUD1	Negative	9	Positive	10
GLUL	Negative	9	Positive	11
GLYR1	Negative	8	Positive	9
GMPR2	Negative	6	Positive	10
GOLGA1	Negative	7	Positive	11
GOLGA2P5	Negative	6	Positive	11
GOLGA5	Negative	6	Positive	7
GOLPH3L	Negative	7	Positive	10
GOT2	Negative	8	Positive	6
GP2	Negative	7	Positive	11
GPD1L	Negative	10	Positive	10
GPRC5A	Negative	10	Positive	11
GPRC5C	Negative	11	Positive	10
GPX4	Negative	7	Positive	10
GREB1	Negative	10	Positive	12
GREB1L	Negative	6	Positive	10
GRINA	Negative	8	Positive	6
GRPR	Negative	8	Positive	10
GRTP1	Negative	8	Positive	7
GSE1	Negative	9	Positive	9
GSS	Negative	6	Positive	7
GSTM3	Negative	7	Positive	11
GSTO2	Negative	6	Positive	6
GSTZ1	Negative	9	Positive	9
GTF2H5	Negative	7	Positive	6
GTF3C1	Negative	7	Positive	8
H1F0	Negative	7	Positive	9
H1FX	Negative	6	Positive	7
HAGH	Negative	10	Positive	11
HARS	Negative	7	Positive	7
HARS2	Negative	7	Positive	8
HDAC11	Negative	7	Positive	10
HDGFRP3	Negative	8	Positive	10
HEATR6	Negative	7	Positive	8
HEBP1	Negative	9	Positive	12
HECTD4	Negative	7	Positive	10
HEXIM1	Negative	8	Positive	12
HHAT	Negative	11	Positive	12
HIGD1A	Negative	7	Positive	8
HIP1	Negative	7	Positive	11
HIRIP3	Negative	8	Positive	9
HIST1H2AC	Negative	8	Positive	10
HIST1H2BD	Negative	9	Positive	9
HIST1H4J	Negative	8	Positive	8
HIST2H2BE	Negative	11	Positive	10
HK1	Negative	8	Positive	6
HMG20B	Negative	9	Positive	6
HMGCL	Negative	7	Positive	10
HMGCR	Negative	7	Positive	6
HN1L	Negative	9	Positive	8
HNRNPA0	Negative	7	Positive	8
HOOK1	Negative	9	Positive	9
HOXB2	Negative	6	Positive	10
HPN	Negative	9	Positive	11
HPX	Negative	7	Positive	11
HRASLS2	Negative	6	Positive	10
HSD17B4	Negative	7	Positive	11
HSD17B8	Negative	8	Positive	11
HSDL2	Negative	6	Positive	10
HSPA2	Negative	9	Positive	12
HSPB1	Negative	9	Positive	12
HSPB8	Negative	7	Positive	10
HTT	Negative	6	Positive	8
IARS2	Negative	7	Positive	6
ICA1	Negative	9	Positive	9
IDUA	Negative	7	Positive	10
IER3	Negative	9	Positive	11
IFT122	Negative	10	Positive	12
IFT140	Negative	11	Positive	11
IFT46	Negative	7	Positive	10
IFT81	Negative	10	Positive	11
IFT88	Negative	9	Positive	11
IGF1R	Negative	12	Positive	12
IGFBP2	Negative	10	Positive	10
IK	Negative	6	Positive	9
IKBKB	Negative	9	Positive	11
IL6ST	Negative	9	Positive	12
IMP3	Negative	6	Positive	6
ING2	Negative	8	Positive	10
INPP4B	Negative	8	Positive	12
INPP5J	Negative	10	Positive	10
INTS12	Negative	7	Positive	10
IPO4	Negative	8	Positive	6
IQCE	Negative	11	Positive	10
IQCH	Negative	9	Positive	10
IQCK	Negative	10	Positive	11
IRS1	Negative	6	Positive	11
IRX5	Negative	11	Positive	10
ISOC1	Negative	7	Positive	8
ISYNA1	Negative	7	Positive	8
ITPK1	Negative	9	Positive	12
ITPR1	Negative	6	Positive	11
IVD	Negative	9	Positive	11
KAT6B	Negative	6	Positive	11
KAZALD1	Negative	6	Positive	8
KCND3	Negative	6	Positive	11
KCNE4	Negative	9	Positive	12
KCNF1	Negative	8	Positive	11
KCNJ3	Negative	8	Positive	11
KCNK15	Negative	10	Positive	10
KCNS3	Negative	6	Positive	7
KCTD2	Negative	6	Positive	8
KCTD3	Negative	11	Positive	11
KDM4B	Negative	10	Positive	11
KIAA0040	Negative	10	Positive	11
KIAA0232	Negative	10	Positive	10
KIAA0319L	Negative	9	Positive	10
KIAA0391	Negative	6	Positive	8
KIAA0556	Negative	8	Positive	11
KIAA1324	Negative	9	Positive	11
KIAA1467	Negative	7	Positive	7
KIAA1598	Negative	6	Positive	7
KIF13B	Negative	7	Positive	12
KIF16B	Negative	7	Positive	9
KIF3A	Negative	8	Positive	11
KIF3B	Negative	9	Positive	9
KIF5C	Negative	7	Positive	11
KITLG	Negative	6	Positive	11
KLHDC2	Negative	7	Positive	10
KLHL12	Negative	7	Positive	8
KRR1	Negative	9	Positive	12
KRT18	Negative	12	Positive	11
KRT19	Negative	9	Positive	10
KRT8	Negative	10	Positive	11
KTN1	Negative	7	Positive	11
LAMA5	Negative	8	Positive	12
LAMTOR3	Negative	7	Positive	8
LARP4	Negative	8	Positive	9
LASP1	Negative	6	Positive	8
LCMT1	Negative	6	Positive	9
LCMT2	Negative	9	Positive	10
LFNG	Negative	6	Positive	7
LGALS8	Negative	9	Positive	9
LIAS	Negative	6	Positive	9
LIG3	Negative	8	Positive	6
LINC00094	Negative	7	Positive	9
LLGL2	Negative	7	Positive	6
LMAN2L	Negative	7	Positive	10
LONRF2	Negative	6	Positive	7
LRBA	Negative	11	Positive	11
LRIG1	Negative	7	Positive	10
LRP10	Negative	9	Positive	10
LRRC23	Negative	7	Positive	9
LRRC46	Negative	6	Positive	6
LRRC6	Negative	7	Positive	11
LRRC8E	Negative	9	Positive	10
LZTFL1	Negative	9	Positive	11
MACROD1	Negative	7	Positive	6
MAGED2	Negative	10	Positive	11
MAN2B2	Negative	7	Positive	10
MAP3K1	Negative	6	Positive	9
MAP9	Negative	7	Positive	8
MAPK3	Negative	6	Positive	10
MAPT	Negative	11	Positive	11
MARVELD2	Negative	6	Positive	7
MAST4	Negative	7	Positive	11
MAT2A	Negative	6	Positive	7
MB	Negative	9	Positive	8
MBOAT7	Negative	9	Positive	8
MCCC2	Negative	11	Positive	12
MCF2L	Negative	8	Positive	9
MEAF6	Negative	9	Positive	8
MED13L	Negative	11	Positive	12
MED16	Negative	6	Positive	10
MEGF9	Negative	10	Positive	10
MEIS3P1	Negative	7	Positive	10
METRN	Negative	11	Positive	11
MFSD5	Negative	9	Positive	10
MGEA5	Negative	6	Positive	10
MGMT	Negative	8	Positive	10
MGRN1	Negative	7	Positive	8
MGST2	Negative	9	Positive	10
MICALL2	Negative	6	Positive	10
MINPP1	Negative	6	Positive	8
MKL2	Negative	11	Positive	12
MKNK2	Negative	7	Positive	10
MKS1	Negative	6	Positive	9
MLPH	Negative	10	Positive	12
MLST8	Negative	7	Positive	6
MMEL1	Negative	6	Positive	6
MMP17	Negative	6	Positive	8
MNAT1	Negative	8	Positive	9
MOAP1	Negative	9	Positive	11
MOCS2	Negative	6	Positive	9
MPDU1	Negative	6	Positive	6
MPG	Negative	8	Positive	9
MPI	Negative	7	Positive	8
MREG	Negative	8	Positive	10
MRFAP1L1	Negative	8	Positive	10
MRPL22	Negative	6	Positive	6
MRPL24	Negative	8	Positive	9
MRPS27	Negative	8	Positive	10
MRPS30	Negative	9	Positive	11
MRPS34	Negative	9	Positive	8
MSH3	Negative	8	Positive	10
MSL1	Negative	6	Positive	6
MSMB	Negative	8	Positive	10
MSX2	Negative	8	Positive	11
MTL5	Negative	11	Positive	12
MTUS1	Negative	6	Positive	10
MUC1	Negative	7	Positive	11
MYB	Negative	11	Positive	12
MYL5	Negative	7	Positive	10
MYLIP	Negative	7	Positive	11
MYO5C	Negative	10	Positive	11
MYO6	Negative	9	Positive	11
MYT1	Negative	7	Positive	11
MZF1	Negative	8	Positive	11
N4BP3	Negative	7	Positive	9
N6AMT1	Negative	7	Positive	6
NAA60	Negative	6	Positive	9
NAPA	Negative	8	Positive	8
[truncated: 558 more rows]
